# Supplementary material
Source: ML conference proceedings conference paper supplement (https://proceedings.neurips.cc/paper_files/paper/2010/hash/4a213d37242bdcad8e7300e202e7caa4-Abstract.html)
Supplement: Supplementary file 1 [file 4a213d37242bdcad8e7300e202e7caa4-Supplemental.zip]

---

# Supplement for the paper titled “Co-regularization Based Semi-supervised Domain Adaptation”

---

**Hal Daumé III**

Department of Computer Science  
University of Maryland CP, MD, USA  
hal@umiacs.umd.edu

**Abhishek Kumar**

Department of Computer Science  
University of Maryland CP, MD, USA  
abhishek@umiacs.umd.edu

**Avishek Saha**

School Of Computing  
University of Utah, UT, USA  
avishek@cs.utah.edu

In the following, we provide proofs for Theorem 4.2, Theorem 4.4 and Theorem 4.5. Note that the derivations and proofs make use of the kernel sub-matrices  $A, B, C, D, E, F$  (as defined in Eq. 4.6 of the original paper).

## 1 Proof of Theorem 4.2

Let  $h_s^*$  and  $h_t^*$  be the optimal source and target hypotheses in  $\mathcal{H}_s$  and  $\mathcal{H}_t$  respectively. Using triangle inequality for the loss function, we have

$$\epsilon_t(h_t, f_t) \leq \epsilon_t(h_t, h_t^*) + \epsilon_t(h_t^*, f_t).$$

We use the notion of  $d_{\mathcal{H}\Delta\mathcal{H}}$ -distance in the next step, which is defined as  $\sup_{h_1, h_2 \in \mathcal{H}} 2|\epsilon_s(h_1, h_2) - \epsilon_t(h_1, h_2)|$  [1]. This gives us

$$\epsilon_t(h_t, f_t) \leq \epsilon_s(h_t, h_t^*) + \frac{1}{2}d_{\mathcal{H}_t\Delta\mathcal{H}_t}(D_s, D_t) + \epsilon_t(h_t^*, f_t).$$

We make use of triangle inequality again to get

$$\epsilon_t(h_t, f_t) \leq \epsilon_s(h_t, f_s) + \epsilon_s(f_s, f_t) + \epsilon_s(h_t^*, f_t) + \frac{1}{2}d_{\mathcal{H}_t\Delta\mathcal{H}_t}(D_s, D_t) + \epsilon_t(h_t^*, f_t).$$

We denote  $\eta_s := \epsilon_s(f_s, f_t)$ ,  $\nu_s := \epsilon_s(h_t^*, f_t)$ , and  $\nu_t := \epsilon_t(h_t^*, f_t)$ . Subtracting  $\epsilon_s(h_s, f_s)$  from both sides, we get

$$\begin{aligned} \epsilon_t(h_t, f_t) - \epsilon_s(h_s, f_s) &\leq (\epsilon_s(h_t, f_s) - \epsilon_s(h_s, f_s)) + \frac{1}{2}d_{\mathcal{H}_t\Delta\mathcal{H}_t}(D_s, D_t) + \eta_s + \nu_s + \nu_t \\ &\leq ME_s[h_t(x) - h_s(x)] + \frac{1}{2}d_{\mathcal{H}_t\Delta\mathcal{H}_t}(D_s, D_t) + \eta_s + \nu_s + \nu_t \\ &\quad \text{(using M-Lipschitz property of loss function)} \\ &= ME_s[\langle h_t, k(x, \cdot) \rangle - \langle h_s, k(x, \cdot) \rangle] + \frac{1}{2}d_{\mathcal{H}_t\Delta\mathcal{H}_t}(D_s, D_t) + \eta_s + \nu_s + \nu_t \\ &\quad \text{(using the reproducing kernel property)} \\ &= ME_s[\langle h_t - h_s, k(x, \cdot) \rangle] + \frac{1}{2}d_{\mathcal{H}_t\Delta\mathcal{H}_t}(D_s, D_t) + \eta_s + \nu_s + \nu_t \\ &\leq M\|h_t - h_s\|E_s[|k(x, \cdot)|] + \frac{1}{2}d_{\mathcal{H}_t\Delta\mathcal{H}_t}(D_s, D_t) + \eta_s + \nu_s + \nu_t \\ &= M\|h_t - h_s\|E_s[\sqrt{k(x, x)}] + \frac{1}{2}d_{\mathcal{H}_t\Delta\mathcal{H}_t}(D_s, D_t) + \eta_s + \nu_s + \nu_t. \end{aligned}$$

(Note: Some of the steps involving reduction to the term  $E_s[\sqrt{k(x, x)}]$  are similar to [2].)

## 2 Proof of Theorem 4.4: Complexity for EA

In this section, we bound the complexity of target hypothesis class  $\mathcal{J}_{EA}^t$  for EA. The base hypothesis class  $\mathcal{H}$  in Eq. 4.3 (of the original paper) is symmetric in source and target hypotheses. So the complexity of source class  $\mathcal{J}_{EA}^s$  can be obtained by replacing adequate terms. We are interested in the complexity of the target hypothesis class  $\mathcal{J}_{EA}^t$  which is defined as  $\mathcal{J}_{EA}^t := \{h_2 : \mathcal{X} \mapsto \mathbb{R}, (h_1, h_2) \in \mathcal{H}\}$ , where  $h_1$  is not fixed a priori.

The Rademacher complexity of  $\mathcal{J}_{EA}^t$  is defined as

$$\hat{R}_n(\mathcal{J}_{EA}^t) = E_\sigma \left[ \sup_{(h_1, h_2) \in \mathcal{H}} \left| \frac{2}{l_t} \sum_{i=1}^{l_t} \sigma_i h_2(x_i) \right| \right] \quad (2.1)$$

The basic framework of proof is similar to the proof of the main theorem of [3]. The hypothesis class considered in their work is different than ours. They find the complexity of average hypothesis class (i.e.,  $x \mapsto (h_1(x) + h_2(x))/2$ ), while we are interested in class  $\mathcal{J}_{EA}^t$ , as defined above. We also note that  $h_2 \in \mathcal{J}_{EA}^t \implies -h_2 \in \mathcal{J}_{EA}^t$  since  $(h_1, h_2) \in \mathcal{H} \implies (-h_1, -h_2) \in \mathcal{H}$ . This means that we can remove the absolute value sign from Eq. 2.1. Since,  $\forall i, h_2(x_i) = \langle k(x_i, \cdot), h_2 \rangle$ , we can restrict the supremum to  $h_1$  and  $h_2$  that are in the span of all samples and also in  $\mathcal{H}$ . The restricted condition on  $(h_1, h_2)$  then becomes

$$\{(h_\alpha, h_\beta) : \lambda_1 \alpha' K \alpha + \lambda_2 \beta' K \beta + \lambda(\alpha - \beta)' K (\alpha - \beta) \leq 1\} = \{(h_\alpha, h_\beta) : (\alpha' \beta') M (\alpha' \beta')' \leq 1\}$$

where

$$M = \begin{pmatrix} (\lambda_1 + \lambda)K & -\lambda K \\ -\lambda K & (\lambda_2 + \lambda)K \end{pmatrix},$$

and  $K$  is the kernel matrix for source labeled and target labeled samples. Using the reproducing kernel property, we get

$$\hat{R}_n(\mathcal{J}_{EA}^t) = \frac{2}{l_t} E_\sigma \sup_{\alpha, \beta \in \mathbb{R}^{l_s + l_t}} \{\sigma' (C' B) \beta : (\alpha' \beta') M (\alpha' \beta')' \leq 1\}.$$

For a symmetric positive definite matrix  $M$ , it can be shown that

$$\sup_{(\alpha, \beta) : (\alpha' \beta') M (\alpha' \beta')' \leq 1} \sigma' \beta = \|(M/M_{11})^{-1/2} x\| = \|(M^{-1})_{22}^{1/2} x\|, \quad (2.2)$$

and the maxima occurs at  $\alpha = -M_{11}^{-1} M_{12} \beta$ .  $M/M_{11}$  is the Schur complement of block  $M_{11}$  of matrix  $M$  (i.e.  $M/M_{11} = M_{22} - M_{21} M_{11}^{-1} M_{12}$ ).

The matrix  $M$  may not always be full rank, however it can be noted that if  $\beta$  is in the null space of  $K$ ,  $(C' B)\beta$  will be zero. So, we can project  $\beta$  onto the column space of  $K$  (or row space due to  $K$  being a symmetric matrix) to get  $\beta_{pr}$  and the term  $(C' B)\beta_{pr}$  is equal to  $(C' B)\beta$ . Specifically,  $\beta_{pr}$  can be thought as computed by the operation  $U U_{pr}^T \beta$  where  $U$  is the full eigenvector matrix and  $U_{pr}$  is the eigenvector matrix consisting of only the vectors having nonzero eigenvalues. So, the sup is restricted to the projected  $\alpha_{pr}$  and  $\beta_{pr}$ , and the expression for Rademacher complexity can be rewritten as

$$\hat{R}_n(\mathcal{J}_{EA}^t) = \frac{2}{l_t} E_\sigma \sup_{\alpha_{pr}, \beta_{pr} \in \text{ColSpace}\{K\}} \left\{ \sigma' (C' B) \beta_{pr} : (\alpha'_{pr} \beta'_{pr}) M (\alpha'_{pr} \beta'_{pr})' \leq 1 \right\}.$$

We proceed in a manner similar to that used in [3] and diagonalize the kernel matrix  $K$  to get orthonormal bases  $U$  corresponding the nonzero eigenvalues ( $K = U' \Lambda U$ ).  $\Lambda$  is a diagonal matrix of size  $r \times r$ , containing just the nonzero eigenvalues and  $r$  is the rank of matrix  $K$ . Since  $\alpha_{pr}$  and  $\beta_{pr}$  are in the span of column space of  $K$ , there exist  $a_s$  and  $b$  such that

$$\alpha_{pr} = U a \quad \text{and} \quad \beta_{pr} = U b$$

The expression for complexity now becomes,  $\hat{R}_n(\mathcal{J}_{EA}^t) = \frac{2}{l_t} E_\sigma \sup \{\sigma' W b : (a' b') P (a' b')' \leq 1\}$  where  $W = (C' B)U$  and

$$P = \begin{pmatrix} (\lambda_1 + \lambda)\Lambda & -\lambda\Lambda \\ -\lambda\Lambda & (\lambda_2 + \lambda)\Lambda \end{pmatrix}$$

Using Eq. 2.2, the supremum can be evaluated as

$$\hat{R}_n(\mathcal{J}_{EA}^t) = \frac{2}{l_t} E_\sigma \| (P^{-1/2})_{22} W' \sigma \|^2.$$

We now make use of Kahane-Khintchine inequality [4] which is stated in the following lemma.

**Lemma 2.1.** *For any vectors  $a_1, a_2, \dots, a_n$  and independent Rademacher random variables  $\sigma_1, \sigma_2, \dots, \sigma_n$ , we have*

$$\frac{1}{\sqrt{2}} E \|\sigma_{i=1}^n \sigma_i a_i\|^2 \leq (E \|\sigma_{i=1}^n \sigma_i a_i\|)^2 \leq E \|\sigma_{i=1}^n \sigma_i a_i\|^2$$

Using the above inequality we get a lower and upper bound on the complexity as

$$\frac{2C_{EA}^t}{2^{1/4} l_t} \leq \hat{R}_n(\mathcal{J}_{EA}^t) \leq \frac{2C_{EA}^t}{l_t}, \quad (2.3)$$

where

$$\begin{aligned} (C_{EA}^t)^2 &= E_\sigma \| (P^{-1})_{22}^{1/2} W' \sigma \|^2 \\ &= E_\sigma (\sigma' W (P^{-1})_{22} W' \sigma) \\ &= E_\sigma \text{tr} \{ \sigma \sigma' W (P^{-1})_{22} W' \} \\ &= \text{tr} \{ W (P^{-1})_{22} W' \}. \end{aligned} \quad (2.4)$$

The above expression can be written in terms of original kernel sub-matrices by doing algebraic manipulations on the eigenbases using similar steps as in [3]. We finally get the result

$$(C_{EA}^t)^2 = \frac{1}{\lambda_2} \left( \frac{1}{1 + \frac{1}{\frac{\lambda_2}{\lambda_1} + \frac{\lambda_2}{\lambda}}} \right) \text{tr}(B).$$

Plugging it into Eq. 2.3 gives the desired bounds on the Rademacher complexity of the EA target hypothesis class.

### 3 Proof of Theorem 4.5: Complexity for EA++

In this section, we bound the complexity of the target hypothesis class  $\mathcal{J}_{++}^s$  for EA++. The base hypothesis class  $\mathcal{H}_{++}$  in Eq. 4.3 (of the original paper) in source and target hypotheses. So the complexity of source class  $\mathcal{J}_{++}^s$  can be obtained by replacing adequate terms. We are interested in the complexity of the hypothesis class  $\mathcal{J}_{++}^t$  which is defined as  $\mathcal{J}_{++}^t := \{h_2 : \mathcal{X} \mapsto \mathbb{R}, (h_1, h_2) \in \mathcal{H}_{++}\}$ , where  $h_1$  is not fixed a priori.

The Rademacher complexity of  $\mathcal{J}_{++}^t$  is defined as

$$\hat{R}_n(\mathcal{J}_{++}^t) = E_\sigma \left[ \sup_{(h_1, h_2) \in \mathcal{H}_{++}} \left| \frac{2}{l_t} \sum_{i=1}^{l_t} \sigma_i h_2(x_i) \right| \right] \quad (3.1)$$

We proceed similar to the complexity proof of EA given in previous section. Note that  $h_2 \in \mathcal{J}_{++}^t \implies -h_2 \in \mathcal{J}_{++}^t$  since  $(h_1, h_2) \in \mathcal{H}_{++} \implies (-h_1, -h_2) \in \mathcal{H}_{++}$ . This means that we can remove the absolute value sign from Eq. 3.1. Since,  $\forall i, h_2(x_i) = \langle k(x_i, \cdot), h_2 \rangle$ , we can restrict the supremum to  $h_1$  and  $h_2$  that are in the span of all samples and also in  $\mathcal{H}_{++}$ . The restricted condition on  $(h_1, h_2)$  then becomes

$$\begin{aligned} &\{(h_\alpha, h_\beta) : \lambda_1 \alpha' K \alpha + \lambda_2 \beta' K \beta + \lambda (\alpha - \beta)' K (\alpha - \beta) + \lambda_u (\alpha - \beta)' M (\alpha - \beta) \leq 1\} \\ &= \{(h_\alpha, h_\beta) : (\alpha' \beta') N (\alpha' \beta')' \leq 1\} \end{aligned}$$

where

$$M = \begin{pmatrix} D \\ E \\ F \end{pmatrix} \begin{pmatrix} D' & E' & F' \end{pmatrix},$$

$$N = \begin{pmatrix} (\lambda_1 + \lambda)K & -\lambda K \\ -\lambda K & (\lambda_2 + \lambda)K \end{pmatrix} + \lambda_u \begin{pmatrix} M & -M \\ -M & M \end{pmatrix},$$

and  $K$  is the kernel matrix for source labeled, target labeled and target unlabeled samples. Using the reproducing kernel property, we get

$$\hat{R}_n(\mathcal{J}_{++}^t) = \frac{2}{l_t} E_\sigma \sup_{(\alpha, \beta) \in \mathbb{R}^{l_s + l_t + l_u}} \{ \sigma'(C' B E) \beta : (\alpha' \beta') N (\alpha' \beta')' \leq 1 \}.$$

Using Eq. 2.2, the supremum in the above equation becomes  $\|(N^{-1})_{22}^{1/2} (C' B E)' \sigma\|$ .

If the matrix  $N$  is not full rank, we can project  $\beta$  and  $\alpha$  onto the column space of  $K$  without changing the supremum (as it is done in the previous proof). So, the sup is restricted to the projected  $\alpha_{pr}$  and  $\beta_{pr}$ , and the expression for Rademacher complexity can be rewritten as

$$\hat{R}_n(\mathcal{J}_{++}^t) = \frac{2}{l_t} E_\sigma \sup_{\alpha_{pr}, \beta_{pr} \in ColSpace\{K\}} \left\{ \sigma'(C' B E) \beta_{pr} : (\alpha'_{pr} \beta'_{pr}) N (\alpha'_{pr} \beta'_{pr})' \leq 1 \right\}.$$

We proceed in a manner similar to the previous proof and diagonalize the kernel matrix  $K$  to get orthonormal bases  $U$  corresponding the nonzero eigenvalues ( $K = U' \Lambda U$ ).  $\Lambda$  is a diagonal matrix of size  $r \times r$ , containing just the nonzero eigenvalues and  $r$  is the rank of matrix  $K$ . Since  $\alpha_{pr}$  and  $\beta_{pr}$  are in the span of column space of  $K$ , there exist  $a_s$  and  $b$  such that  $\alpha_{pr} = Ua$ ,  $\beta_{pr} = Ub$ .

The expression for complexity now becomes,

$$\hat{R}_n(\mathcal{J}_{++}^t) = \frac{2}{l_t} E_\sigma \sup \{ \sigma' W b : (a' b') P (a' b')' \leq 1 \}$$

where  $W = (C' B E)U$  and

$$P = \begin{pmatrix} (\lambda_1 + \lambda)\Lambda & -\lambda\Lambda \\ -\lambda\Lambda & (\lambda_2 + \lambda)\Lambda \end{pmatrix} + \lambda_u \begin{pmatrix} V' & 0 \\ 0 & V' \end{pmatrix} \begin{pmatrix} M & -M \\ -M & M \end{pmatrix} \begin{pmatrix} V & 0 \\ 0 & V \end{pmatrix}$$

The solution to the above maximization problem is given by  $\|(P^{-1})_{22}^{1/2} W' \sigma\|$ . Using Kahane-Khintchine inequality and taking similar steps as in Eq. 2.4, we get the following result:

$$\frac{2C_{++}^t}{2^{1/4} l_t} \leq \hat{R}_n(\mathcal{J}_{++}^t) \leq \frac{2C_{++}^t}{l_t}, \quad (3.2)$$

where  $(C_{++}^t)^2 = tr\{W(P^{-1})_{22}W'\}$ .

Let  $T$  be the first term in the above expression for  $P$ . The second term can be written as  $RR'$  where

$$R = \begin{pmatrix} V' & 0 \\ 0 & V' \end{pmatrix} \begin{pmatrix} D \\ E \\ F \\ D \\ E \\ F \end{pmatrix}$$

Using the matrix inversion lemma, we have  $(T + \lambda_u RR')^{-1} = T^{-1} - \lambda_u T^{-1} R (I + \lambda_u R' T^{-1} R)^{-1} R' T^{-1}$ . The term  $tr\{W(T^{-1})_{22}W'\}$  evaluates to the same expression as the complexity of EA in previous proof. The second term can also be reduced in terms of original kernel sub-matrices by performing algebraic manipulations on eigenbases using similar steps as used in [3]. We finally get the result

$$(C_{++}^t)^2 = \left( \frac{1}{\lambda_2 + \left( \frac{1}{\lambda_1} + \frac{1}{\lambda} \right)^{-1}} \right) tr(B) - \lambda_u \left( \frac{\lambda_1}{\lambda \lambda_1 + \lambda \lambda_2 + \lambda_1 \lambda_2} \right)^2 tr(E(I + kF)^{-1} E'),$$

where  $k = \frac{\lambda_u(\lambda_1 + \lambda_2)}{\lambda \lambda_1 + \lambda \lambda_2 + \lambda_1 \lambda_2}$ . Plugging it into Eq. 3.2 gives the desired bounds on the Rademacher complexity of EA++ target hypothesis class.

## References

- [1] John Blitzer, Koby Crammer, Alex Kulesza, Fernando Pereira, and Jennifer Wortman. Learning bounds for domain adaptation. In *NIPS'07*, pages 129–136, Vancouver, B.C., December 2007.
- [2] Yishay Mansour, Mehryar Mohri, and Afshin Rostamizadeh. Domain adaptation: Learning bounds and algorithms. In *COLT'09*, Montreal, Quebec, June 2009.
- [3] D. S. Rosenberg and P. L. Bartlett. The Rademacher complexity of co-regularized kernel classes. In *AISTATS'07*, pages 396–403, San Juan, Puerto Rico, March 2007.
- [4] Rafal Latała and Krzysztof Oleszkiewicz. On the best constant in the Khinchin-Kahane inequality. *Studia Mathematica*, 109:101–104, 1994.
